# Supplementary material
Source: HighWire-hosted journal article supplement (https://bmjopen.bmj.com/content/12/4/e053165)
Supplement: inline-supplementary-material-1 [file inline-supplementary-material-1.pdf]

Supplementary Materials

Appendix 1: Vanguard Phase: Summary of Progress

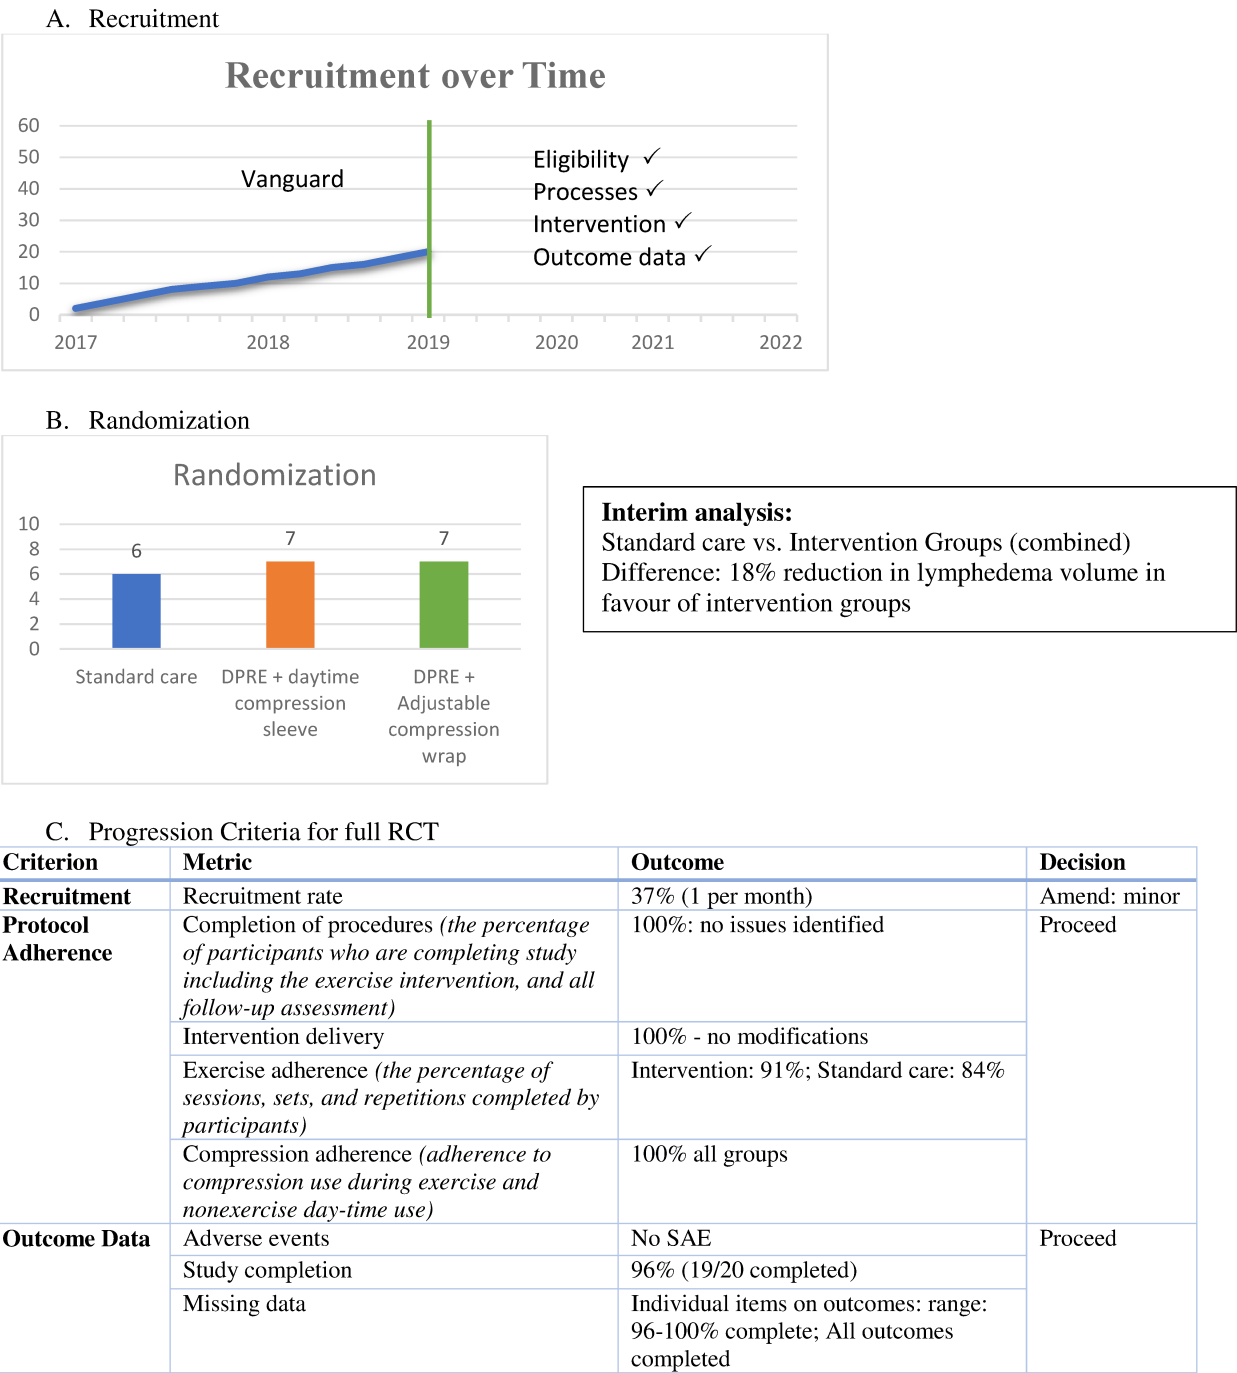

## Supplementary Materials

**Table S1: Exercise principles**

| <b>Components</b>                                    | <b>Principles</b>                         | <b>Benefits</b>                                                                                                                              |
|------------------------------------------------------|-------------------------------------------|----------------------------------------------------------------------------------------------------------------------------------------------|
| <b>Decongestive exercise sequence</b> <sup>1-3</sup> | Follow a sequence from proximal to distal | - Enhance lymph drainage from the edematous area through the use of the skeletal-muscle contraction to promote venous and lymphatic return w |
| <b>Resistance exercise</b> <sup>4,5</sup>            | Overload, progression, and specificity    | - Improve lymphedema symptoms<br>- Improve muscle strength, and quality of life                                                              |
| <b>Compression</b> <sup>6-8</sup>                    | Enhancement of muscle pump                | Improve long-term control of the lymphedema                                                                                                  |

**Table S2: Exercise protocol**

|                                | <b>Weight machines and free weights</b>                                                                                                                                                                                                                               | <b>Resistance Band (RB)*</b>                                                                                                                                                                                                                                                                                                                                       |
|--------------------------------|-----------------------------------------------------------------------------------------------------------------------------------------------------------------------------------------------------------------------------------------------------------------------|--------------------------------------------------------------------------------------------------------------------------------------------------------------------------------------------------------------------------------------------------------------------------------------------------------------------------------------------------------------------|
| <b>Exercise</b>                | <ul style="list-style-type: none"> <li>• Upper limb:<br/>Shoulder shrugs, chest press, seated row, lateral raise, biceps curls, triceps pulldown, wrist curl, reverse wrist curl, handgrip</li> <li>• Lower limb:<br/>Leg press, leg curl</li> </ul>                  |                                                                                                                                                                                                                                                                                                                                                                    |
| <b>Initial/starting weight</b> | <ul style="list-style-type: none"> <li>• Upper limb:<br/>1RM: 30-35%<br/>RPE: 2-3 (mild)</li> <li>• Lower limb:<br/>1RM: 60%<br/>RPE: 4-5</li> </ul> <p>- The intensity will be adjusted by adding/removing weight.</p>                                               | <ul style="list-style-type: none"> <li>• Upper limb:<br/>RPE: 2-3 (mild)</li> <li>• Lower limb:<br/>RPE: 4-5</li> </ul> <p>-The intensity will be adjusted by tension first and then by RB strength (color).</p>                                                                                                                                                   |
| <b>Progression**</b>           |                                                                                                                                                                                                                                                                       |                                                                                                                                                                                                                                                                                                                                                                    |
| • <b>Intensity</b>             | <ul style="list-style-type: none"> <li>• Upper limb:<br/>-Weight will be increased by 5% of the 1 RM (weekly)<br/>-RPE: 3-5 (mild to moderate)</li> <li>• Lower limb:<br/>-Weight will be increased by 5-10% of the 1 RM (weekly)<br/>-RPE: 5-6 (moderate)</li> </ul> | <ul style="list-style-type: none"> <li>• Upper limb:<br/>-RB intensity will be increased by band tension, or band strength (color, or combining two RB.<br/>-RPE: 3-5 (mild to moderate)</li> <li>• Lower limb:<br/>-RB intensity will be increased by band tension first and then by RB strength (color, or combining two RB.<br/>-RPE: 5-6 (moderate)</li> </ul> |
| • <b>Volume</b>                | 2 X 10, 2X12, 2X15<br>(then increase resistance and drop number of repetitions)                                                                                                                                                                                       |                                                                                                                                                                                                                                                                                                                                                                    |
| • <b>Rest intervals</b>        | 2 min                                                                                                                                                                                                                                                                 |                                                                                                                                                                                                                                                                                                                                                                    |
| • <b>Velocity</b>              | Slow to moderate with breathing (two seconds concentric, four seconds eccentric)                                                                                                                                                                                      |                                                                                                                                                                                                                                                                                                                                                                    |
| • <b>Frequency</b>             | 2Xwk                                                                                                                                                                                                                                                                  |                                                                                                                                                                                                                                                                                                                                                                    |

\* Adopted training protocols from (Colado and Triplett, 2008)<sup>9</sup>. Each participant will be provided with 1.5-2 meter of 3- levels RB. Each band will be marked with reference points (10cm) to control the intensity. The band reference values provided by (Uchida et. al 2016)<sup>10</sup> will be used to estimate the starting RB color.

\*\*The exercise will be progressed in the second week, first by increasing the number of repetitions, and then by increasing the intensity. The RPE will be used to quantify the exercise intensity and to inform the progression of exercise resistance. The exercises will be tailored based on the lymphedema symptoms for each participant.

## Supplementary Materials

**Table S3: Exercise monitoring**

| <i>Symptoms</i>                                                                                         | <i>Response</i>                                                                                                                                                                                                                |
|---------------------------------------------------------------------------------------------------------|--------------------------------------------------------------------------------------------------------------------------------------------------------------------------------------------------------------------------------|
| <i>Exacerbation of lymphedema symptoms (tension, tightness, heaviness, pain, or increased swelling)</i> | <ul style="list-style-type: none"> <li>• Participant will be monitored and examined by lymphedema therapist</li> <li>• Exercise intensity will be reduced by decreasing the number of repetitions and/or resistance</li> </ul> |
| <i>Worsening of fatigue</i>                                                                             | <ul style="list-style-type: none"> <li>• Exercise intensity will be reduced by decreasing the number of repetitions</li> </ul>                                                                                                 |

**Table 4: The percentage change in arm lymphedema calculation formula**

|                                                |                                                                                                      |
|------------------------------------------------|------------------------------------------------------------------------------------------------------|
| <i>Lymphedema absolute volume (LAV)</i>        | <i>LAV=affected volume – unaffected volume (mls)</i>                                                 |
| <i>Absolute change in excess volume (mls)</i>  | <i>LAV (baseline) – LAV (12-weeks)</i>                                                               |
| <i>Lymphedema relative volume (LRV) change</i> | <i>(1) LAV baseline – LAV 12-weeks</i><br><i>(2) LAV at baseline</i><br>$\frac{(1)}{(2)} \times 100$ |

### References:

1. National Lymphedema Network. Position Statement of the National Lymphedema Network: Topic: Exercise for Lymphedema Patients. 2011. <https://lymphnet.org/position-papers>.
2. Fu MR, Deng J, Armer JM. Putting evidence into practice: cancer-related lymphedema. Clinical journal of oncology nursing. 2014;18.
3. Ridner SH, Fu MR, Wanchai A, Stewart BR, Armer JM, Cormier JN. Self-management of lymphedema: a systematic review of the literature from 2004 to 2011. Nursing research. 2012;61(4):291-9.
4. Kraemer WJ, Ratamess NA. Fundamentals of resistance training: progression and exercise prescription. Medicine & science in sports & exercise. 2004;36(4):674-88.
5. Paramanandam VS, Roberts D. Weight training is not harmful for women with breast cancer-related lymphoedema: a systematic review. Journal of physiotherapy. 2014;60(3):136-43.
6. Hirai M, Niimi K, Iwata H, Sugimoto I, Ishibashi H, Ota T, et al. Comparison of stiffness and interface pressure during rest and exercise among various arm sleeves. Phlebology. 2010;25(4):196-200.
7. Boris M, Weindorf S. Persistence of lymphedema reduction after noninvasive complex lymphedema therapy. Cancer. 1997;11(1).
8. Ko DS, Lerner R, Klose G, Cosimi AB. Effective treatment of lymphedema of the extremities. Archives of Surgery. 1998;133(4):452-8.
9. Colado JC, Triplett NT. Effects of a short-term resistance program using elastic bands versus weight machines for sedentary middle-aged women. The Journal of Strength & Conditioning Research. 2008;22(5):1441-8.
10. Uchida MC, Nishida MM, Sampaio RAC, Moritani T, Arai H. Thera-band® elastic band tension: reference values for physical activity. Journal of Physical Therapy Science. 2016;28(4):1266-71.
